# Supplementary material for: Ubiquitin-Mediated Response to Microsporidia and Virus Infection in C. elegans
Source: PLoS Pathog. 2014 Jun 19;10(6):e1004200. doi: 10.1371/journal.ppat.1004200 (PMC4063957; doi:10.1371/journal.ppat.1004200)
Supplement: Table S6 — Summary of GSEA results for infected and control samples at each timepoint. (XLSX) [file ppat.1004200.s015.xlsx]

## Sheet: Table_S6 Summary of GSEA result
Table S6: Summary of GSEA results (NOM p-value<0.05, FDR q-value<0.25).
Correlation with genes UPREGULATED during infection 8 hpi
NAME	SIZE	ES	NES	NOM p-val	FDR q-val	FWER p-val	RANK AT MAX	LEADING EDGE
ORSAY UP IN N2 AND RDE-1 BUT UNALTERED IN JU1580	23	0.975339	2.07413	0	0	0	159	tags=91%, list=1%, signal=92%
ORSAY UP IN N2	31	0.923001	2.05116	0	0	0	282	tags=81%, list=1%, signal=82%
UP ON CRY5B	451	0.551769	1.66385	0	0.00212985	0.007	4359	tags=45%, list=21%, signal=57%
UP ON HEAT-SHOCK	646	0.502053	1.54292	0	0.00927202	0.039	3121	tags=27%, list=15%, signal=31%
UP ON CADMIUM	500	0.463207	1.40189	0	0.0488455	0.238	4517	tags=41%, list=22%, signal=51%
UP 12H ON D. CONIOSPORA	344	0.469355	1.39452	0	0.044783	0.257	1789	tags=17%, list=9%, signal=18%
DOWN ON OXIDATIVE STRESS IN N2	163	0.45948	1.28687	0.0475543	0.126532	0.632	3320	tags=26%, list=16%, signal=31%
DOWN 12H ON D. CONIOSPORA	224	0.433036	1.24786	0.0440986	0.144509	0.765	2762	tags=19%, list=14%, signal=22%
UP 24H ON HARPOSPORIUM	515	0.412714	1.24503	0.00453515	0.132584	0.77	2784	tags=21%, list=14%, signal=23%
UP 4H ON P. AERUGINOSA PA14	300	0.415052	1.22581	0.0340219	0.14544	0.835	3416	tags=33%, list=17%, signal=39%
Correlation with genes DOWNREGULATED during infection 8 hpi
NAME	SIZE	ES	NES	NOM p-val	FDR q-val	FWER p-val	RANK AT MAX	LEADING EDGE
DOWN ON CRY5B	522	-0.542706	-1.8623	0	0	0	4388	tags=59%, list=22%, signal=74%
DOWN ON CADMIUM	437	-0.521429	-1.76744	0	0	0	4697	tags=59%, list=23%, signal=75%
DOWN 4H ON PA14 VS GACA	80	-0.478851	-1.40448	0.00967742	0.0611428	0.138	4615	tags=58%, list=23%, signal=74%
DOWN 4H ON P. AERUGINOSA PA14	112	-0.468193	-1.38869	0.00722022	0.0540667	0.157	3988	tags=51%, list=20%, signal=63%
DOWN 8H ON PA14 VS GACA	173	-0.448336	-1.38731	0	0.0432533	0.157	4299	tags=42%, list=21%, signal=52%
DOWN 8H ON P. AERUGINOSA PA14	219	-0.4083	-1.30765	0.0134529	0.0695085	0.275	4294	tags=42%, list=21%, signal=53%
Correlation with genes UPREGULATED during infection 16 hpi
NAME	SIZE	ES	NES	NOM p-val	FDR q-val	FWER p-val	RANK AT MAX	LEADING EDGE
ORSAY UP IN N2	31	0.941269	2.12575	0	0	0	284	tags=81%, list=1%, signal=82%
ORSAY UP IN N2 AND RDE-1 BUT UNALTERED IN JU1580	23	0.988086	2.10471	0	0	0	194	tags=91%, list=1%, signal=92%
UP ON HEAT-SHOCK	646	0.422467	1.38426	0	0.0411703	0.213	2954	tags=28%, list=14%, signal=31%
DOWN 24H ON HARPOSPORIUM	241	0.447397	1.36897	0.00186916	0.0359017	0.243	2198	tags=23%, list=11%, signal=25%
Correlation with genes DOWNREGULATED during infection 16 hpi
NAME	SIZE	ES	NES	NOM p-val	FDR q-val	FWER p-val	RANK AT MAX	LEADING EDGE
DOWN 8H ON S. AUREUS	198	-0.519512	-1.55741	0	0.0549775	0.036	3802	tags=40%, list=19%, signal=49%
DOWN 8H ON P. AERUGINOSA PA14	219	-0.458401	-1.38834	0.00612245	0.180016	0.221	4071	tags=39%, list=20%, signal=49%
DAF-16 DOWNREGULATED	229	-0.454007	-1.38566	0.00626305	0.124071	0.226	3939	tags=36%, list=19%, signal=44%
DOWN 8H ON PA14 VS GACA	173	-0.46552	-1.38228	0.00798403	0.094217	0.229	4284	tags=43%, list=21%, signal=54%
DOWN 4H ON P. AERUGINOSA PA14	112	-0.482271	-1.35856	0.0164609	0.0928507	0.272	4071	tags=43%, list=20%, signal=53%
UP 24H ON HARPOSPORIUM	515	-0.396603	-1.29684	0	0.11908	0.448	2138	tags=21%, list=10%, signal=23%
DOWN 12H ON D. CONIOSPORA	224	-0.42612	-1.29128	0.0211416	0.110897	0.469	2138	tags=21%, list=10%, signal=24%
DOWN ON OXIDATIVE STRESS IN N2	163	-0.424831	-1.25662	0.0292887	0.119408	0.575	4449	tags=42%, list=22%, signal=54%
DOWN ON CRY5B	522	-0.384189	-1.24193	0.00421053	0.124451	0.626	4944	tags=39%, list=24%, signal=50%
UP 12H ON D. CONIOSPORA	344	-0.379126	-1.20487	0.0278373	0.158369	0.742	1671	tags=18%, list=8%, signal=19%
Correlation with genes UPREGULATED during infection 30 hpi
NAME	SIZE	ES	NES	NOM p-val	FDR q-val	FWER p-val	RANK AT MAX	LEADING EDGE
ORSAY UP IN N2	31	0.941165	2.22046	0	0	0	734	tags=87%, list=4%, signal=90%
ORSAY UP IN N2 AND RDE-1 BUT UNALTERED IN JU1580	23	0.951691	2.15107	0	0	0	734	tags=91%, list=4%, signal=95%
DOWN ON OXIDATIVE STRESS IN N2	163	0.70113	2.0609	0	0	0	3648	tags=58%, list=18%, signal=70%
UP ON D. CONIOSPORA DETECTED BY AT LEAST 2 TECHNIQUES	59	0.738099	1.93118	0	0	0	1646	tags=39%, list=8%, signal=42%
UP 12H ON D. CONIOSPORA	344	0.557033	1.73414	0	0.000146154	0.001	2372	tags=26%, list=12%, signal=29%
UP ON CRY5B	451	0.504221	1.58193	0	0.00254482	0.022	4800	tags=43%, list=24%, signal=55%
UP ON HEAT-SHOCK	646	0.497028	1.57293	0	0.00277739	0.028	2833	tags=29%, list=14%, signal=33%
UP 24H ON HARPOSPORIUM	515	0.428651	1.34971	0	0.0462112	0.429	2290	tags=22%, list=11%, signal=24%
DOWN 24H ON HARPOSPORIUM	241	0.423113	1.28949	0.0216216	0.0787783	0.658	3641	tags=24%, list=18%, signal=28%
UP 8H ON P. AERUGINOSA PA14	261	0.411257	1.25131	0.0331906	0.0968331	0.813	3049	tags=34%, list=15%, signal=39%
UP 4H ON P. AERUGINOSA PA14	300	0.4015	1.23003	0.038176	0.109992	0.878	2681	tags=30%, list=13%, signal=34%
Correlation with genes DOWNREGULATED during infection 30 hpi
NAME	SIZE	ES	NES	NOM p-val	FDR q-val	FWER p-val	RANK AT MAX	LEADING EDGE
DOWN 8H ON P. AERUGINOSA PA14	219	-0.638063	-2.32493	0	0	0	3716	tags=66%, list=18%, signal=80%
DOWN 4H ON P. AERUGINOSA PA14	112	-0.680589	-2.27259	0	0	0	3225	tags=69%, list=16%, signal=81%
DOWN 4H ON PA14 VS GACA	80	-0.708487	-2.24931	0	0	0	3488	tags=79%, list=17%, signal=95%
DOWN 8H ON PA14 VS GACA	173	-0.616936	-2.1937	0	0	0	3512	tags=60%, list=17%, signal=72%
DOWN 8H ON S. AUREUS	198	-0.547788	-1.95861	0	0	0	3304	tags=55%, list=16%, signal=64%
DOWN ON CADMIUM	437	-0.501198	-1.94145	0	0	0	4089	tags=46%, list=20%, signal=57%
DOWN ON CRY5B	522	-0.483052	-1.87644	0	0	0	4055	tags=49%, list=20%, signal=60%
UPREG BY SEK-1 (IN GLP-4(BN2))	97	-0.491866	-1.61083	0	0.00884632	0.02	2126	tags=40%, list=10%, signal=45%
UPREG BY PMK-1 (IN DAF-2(E1368))	86	-0.425906	-1.38483	0.0185185	0.0500538	0.133	1910	tags=29%, list=9%, signal=32%
DAF-16 DOWNREGULATED	229	-0.367408	-1.32912	0	0.0688455	0.196	2059	tags=23%, list=10%, signal=25%
DOWN 12H ON D. CONIOSPORA	224	-0.36427	-1.30281	0.0104167	0.0757907	0.236	2681	tags=22%, list=13%, signal=25%
Correlation with genes UPREGULATED during infection 40 hpi
NAME	SIZE	ES	NES	NOM p-val	FDR q-val	FWER p-val	RANK AT MAX	LEADING EDGE
ORSAY UP IN N2	31	0.933177	2.34031	0	0	0	656	tags=74%, list=3%, signal=77%
ORSAY UP IN N2 AND RDE-1 BUT UNALTERED IN JU1580	23	0.942627	2.13732	0	0	0	656	tags=83%, list=3%, signal=85%
UP ON HEAT-SHOCK	646	0.396475	1.41366	0	0.0477331	0.101	2784	tags=32%, list=14%, signal=36%
UP ON CRY5B	451	0.383995	1.3323	0	0.0782119	0.215	2730	tags=30%, list=13%, signal=34%
Correlation with genes DOWNREGULATED during infection 40 hpi
NAME	SIZE	ES	NES	NOM p-val	FDR q-val	FWER p-val	RANK AT MAX	LEADING EDGE
DOWN ON CRY5B	522	-0.738201	-2.23666	0	0	0	2573	tags=44%, list=13%, signal=49%
DOWN 8H ON P. AERUGINOSA PA14	219	-0.761422	-2.18594	0	0	0	2811	tags=65%, list=14%, signal=74%
DOWN 8H ON PA14 VS GACA	173	-0.763948	-2.1649	0	0	0	2811	tags=65%, list=14%, signal=74%
DOWN ON CADMIUM	437	-0.692699	-2.0698	0	0	0	2615	tags=38%, list=13%, signal=42%
DOWN 8H ON S. AUREUS	198	-0.709379	-2.05065	0	0	0	2812	tags=61%, list=14%, signal=70%
DOWN 4H ON P. AERUGINOSA PA14	112	-0.743118	-2.01027	0	0	0	3102	tags=71%, list=15%, signal=84%
DOWN 4H ON PA14 VS GACA	80	-0.758529	-1.97916	0	0	0	3102	tags=70%, list=15%, signal=82%
UPREG BY SEK-1 (IN GLP-4(BN2))	97	-0.672205	-1.78451	0	0	0	2704	tags=53%, list=13%, signal=60%
ORSAY DOWN IN N2	15	-0.881507	-1.7299	0	9.87654e-05	0.001	2217	tags=60%, list=11%, signal=67%
UPREG BY PMK-1 (IN DAF-2(E1368))	86	-0.638954	-1.68008	0	0.000448381	0.005	2484	tags=47%, list=12%, signal=53%
DAF-16 UPREGULATED	239	-0.570202	-1.65034	0	0.000650265	0.008	2800	tags=43%, list=14%, signal=49%
UP ON OXIDATIVE STRESS IN N2	312	-0.543871	-1.60639	0	0.00116496	0.015	4586	tags=35%, list=22%, signal=44%
DAF-16 DOWNREGULATED	229	-0.539872	-1.55831	0	0.00200179	0.028	2704	tags=32%, list=13%, signal=36%
DOWN ON HEAT-SHOCK	90	-0.55133	-1.44655	0.00686813	0.0100788	0.14	2571	tags=32%, list=13%, signal=37%
UP 4H ON P. AERUGINOSA PA14	300	-0.453997	-1.32868	0.00687285	0.0390254	0.48	2283	tags=37%, list=11%, signal=41%
UP 8H ON S. AUREUS	187	-0.452589	-1.27925	0.0344828	0.0620599	0.67	2241	tags=35%, list=11%, signal=39%
Correlation with genes UPREGULATED during infection 64 hpi
NAME	SIZE	ES	NES	NOM p-val	FDR q-val	FWER p-val	RANK AT MAX	LEADING EDGE
ORSAY UP IN N2	31	0.849944	2.06884	0	0	0	804	tags=58%, list=4%, signal=60%
ORSAY UP IN N2 AND RDE-1 BUT UNALTERED IN JU1580	23	0.895061	2.06337	0	0	0	509	tags=61%, list=2%, signal=62%
UP ON CRY5B	451	0.404921	1.4415	0	0.051349	0.077	2537	tags=31%, list=12%, signal=34%
UP 8H ON PA14 VS GACA	162	0.410779	1.33694	0	0.115403	0.203	2127	tags=38%, list=10%, signal=42%
UP 12H ON D. CONIOSPORA	344	0.371221	1.28386	0	0.13312	0.285	2221	tags=22%, list=11%, signal=24%
UP 8H ON P. AERUGINOSA PA14	261	0.369923	1.25529	0.0194175	0.137614	0.343	2064	tags=34%, list=10%, signal=38%
UP ON HEAT-SHOCK	646	0.341958	1.24392	0	0.125672	0.359	2827	tags=31%, list=14%, signal=35%
Correlation with genes DOWNREGULATED during infection 64 hpi
NAME	SIZE	ES	NES	NOM p-val	FDR q-val	FWER p-val	RANK AT MAX	LEADING EDGE
DOWN 8H ON P. AERUGINOSA PA14	219	-0.81203	-2.3164	0	0	0	1937	tags=69%, list=9%, signal=75%
DOWN 8H ON S. AUREUS	198	-0.806814	-2.30064	0	0	0	2354	tags=73%, list=12%, signal=81%
DOWN 8H ON PA14 VS GACA	173	-0.812299	-2.29241	0	0	0	1946	tags=66%, list=10%, signal=73%
DOWN 4H ON P. AERUGINOSA PA14	112	-0.814702	-2.20957	0	0	0	1925	tags=71%, list=9%, signal=77%
DOWN 4H ON PA14 VS GACA	80	-0.847695	-2.18843	0	0	0	1925	tags=78%, list=9%, signal=85%
DOWN ON CRY5B	522	-0.707256	-2.11737	0	0	0	3022	tags=43%, list=15%, signal=49%
DOWN ON CADMIUM	437	-0.693363	-2.05626	0	0	0	2610	tags=35%, list=13%, signal=39%
UPREG BY SEK-1 (IN GLP-4(BN2))	97	-0.749492	-1.99066	0	0	0	1970	tags=61%, list=10%, signal=67%
DAF-16 UPREGULATED	239	-0.612579	-1.76536	0	0	0	2552	tags=46%, list=13%, signal=52%
UPREG BY PMK-1 (IN DAF-2(E1368))	86	-0.665502	-1.7279	0	0	0	1650	tags=40%, list=8%, signal=43%
DAF-16 DOWNREGULATED	229	-0.587163	-1.6951	0	0	0	3096	tags=37%, list=15%, signal=43%
DOWNREG BY PMK-1 (IN DAF-2(E1368))	42	-0.617346	-1.4627	0.0129125	0.0072067	0.103	3319	tags=31%, list=16%, signal=37%
UP 24H ON HARPOSPORIUM	515	-0.449296	-1.34745	0	0.027936	0.36	2914	tags=29%, list=14%, signal=33%
DOWN ON HEAT-SHOCK	90	-0.493395	-1.30199	0.0485934	0.0455611	0.552	2708	tags=28%, list=13%, signal=32%
DOWN 12H ON D. CONIOSPORA	224	-0.445643	-1.26909	0.0259009	0.0623896	0.687	3940	tags=28%, list=19%, signal=34%
Gene sets without significant (NOM p-value<0.05, FDR q-value<0.25) correlations to N. parisii infection-regulated C. elegans gene expression:
DOWNREG by SEK-1 (in glp-4(bn2))
UP 4h on PA14 vs gacA
